# Supplementary material
Source: Research Square preprint supplement (doi:10.21203/rs.3.rs-9323924/v1)
Supplement: Supplementary file 1 [file 370a558f3b862e64e54b4577.docx]

**Table 3** Schedule of assessments

|  | Informed consent | Pre-surgery | Registration | Initial surgery | Day after initial surgery | 7 days after initial surgery | 30 days after initial surgery | Day before re-do surgery | Day of  re-do surgery | At discharge after re-do surgeries | Discontinuation |
| --- | --- | --- | --- | --- | --- | --- | --- | --- | --- | --- | --- |
| Allowance for test (day) | - | P **f** | - | 0 day | 0 day | ± 3 days | ±7 days | −7 to 0 days | 0 day | - | - |
| Acquisition of informed consent | P |  |  |  |  |  |  |  |  |  |  |
| Patient information  Patient background |  | P | Determination of eligibility (case registration) |  |  |  |  |  |  |  |  |
| Disease information |  | P |  |  |  |  | P |  |  |  |
| Medical history/complications |  | P |  |  |  |  |  |  |  |  |
| Allergy information |  | P |  |  |  |  |  |  |  |  |
| Test information **g**  12-lead electrocardiogram test |  | P **i** |  |  |  |  | P |  |  | P **k** |
| Vital signs |  |  | P **j** | P | P | P |  | P |  | P **k** |
| Echocardiography test |  | P **i** |  |  |  | P | P |  |  | P **k** |
| Chest X-ray test |  | P **i** |  |  |  | P | P |  |  | P **k** |
| Blood test**h** |  | P **i** |  | P | P | P | P |  |  | P **k** |
| Open heart surgery information |  |  | P |  |  |  |  |  |  |  |
| Status of drain placement**l** |  |  |  |  |  |  |  |  |  |  |
| Re-do surgery information |  |  |  |  |  |  |  | P |  | P **k** |
| Surgery record taking |  |  |  |  |  |  |  | P |  | P **k** |
| Concomitant therapy information |  |  | P | P | P | P | P | P | P | P **g** |
| Adverse events/malfunctions |  |  |  |  |  |  |  |  |  | P **g** |

P indicates sampling points. Special conditions:a If open heart surgery is extended by >1 day, the day of surgery completion (time of surgery completion in the medical record) will be recorded as "the day of open heart surgery (Day 0)." b Pediatric patients who undergo re-doopen heart surgery at <3 months (90 days) after open heart surgery will be evaluated for safety. In addition, tests and observations before re-do surgery, on the day of re-do surgery and at discharge after re-do surgery should be performed whenever possible. If the chest is reopened the day after the thoracotomy, 7 days, or 30 days after re-do surgery, the examinations and observation items the day after thoracotomy, 7 days and 30 days visit after re-do surgery should be performed whenever possible. c The most recent data obtained during the allowance period for the test will be used. d The evaluation of adhesion will be performed only at re-do surgery to assess efficacy. It should also be performed whenever possible in cases where re-do surgery is performed ≥3 months (90 days) after initial surgery. e Adverse events and malfunctions should be followed until discharge (≤30 days after re-do surgery). f To be conducted within 7 days prior to registration. g If the test is performed more than once on the same day or during the allowance period for the test at the visit, the most recent data will be used. h To be performed during the allowance period for the test. However, if the test date falls outside the permitted timeframe for any reason after the test has been conducted, the test does not need to be repeated if the investigator or sub-investigator determines that repeating it is unnecessary and that the previously obtained results are acceptable. I If there is any in-hospital measurement for the purpose of surgery ≤7 days before registration, the results before informed consent can be used as pre-surgery test results at the discretion of the investigator. j The most recent data obtained between 48 hours before surgery and immediately before the start of surgery (entering the operation room) will be used. k Tests and observation items at the time of discontinuation should be collected whenever feasible. l Monitor the placement status of the drain, daily drainage volume, and drainage characteristics following open heart surgery. If the drain remains in place >7 days post-surgery, assessments will continue until the day of removal
