# Supplementary material
Source: Research Square preprint supplement (doi:10.21203/rs.3.rs-9323924/v1)
Supplement: Supplementary file 2 [file a0986f019e7b1d0d373a348a.docx]

**Safety Endpoints**

Adverse events (AEs) will be defined as any untoward or unexpected disease or failure and clinical signs (including abnormal laboratory findings) that occurs in the pediatric patient or other person using the study device regardless of the causal relationship with BAX602. An event that occurs in persons other than the pediatric patient is considered as an AE only when it is suspected to be a result of the use of the BAX602. Mild AEs will be defined as those with symptomatic or mild symptoms, clinical or laboratory findings only, or for which no treatment is required. Moderate AEs will be defined as those requiring minimal, local or noninvasive intervention. Severe AEs will be defined as those that are severe or medically significant, but not immediately life-threatening; require inpatient hospitalization or prolongation of existing hospitalization; result in inactivity or are incapacitating; are life-threatening; require urgent intervention; or result in death.

When AEs occur, the investigator or sub investigator will record in the case report form whether treatment intervention is required or not. The investigator or sub investigator will report all serious AEs and malfunctions to the sponsor within 24 hours of being observed, and they will follow-up with a written submission to the head of the medical institution and the sponsor as soon as possible, considering the causal relationship with the study device.

**References**

1. Angiotech Pharmaceuticals (2003) Angiotech receives CE mark approval for new premix CoSeal® surgical sealant. Available at: <https://www.sec.gov/Archives/edgar/data/1096481/000117625603000090/form6-kcosealpremix.htm> (Accessed 10 April )

2. FDA (2001) Summary of Safety and Effectiveness Data - CoSeal™ Surgical Sealant (P010022). Available at: <https://www.accessdata.fda.gov/cdrh_docs/pdf/p010022b.pdf> (Accessed 10 April)

3. Surgery BA (2014) COSEAL Surgical Sealant - Baxter Advanced Surgery. Available at: <https://www.advancedsurgery.baxter.com/sites/g/files/ebysai3391/files/2019-02/0725395_10SEP2014_Coseal_IFU1.pdf> (Accessed 08 May)

4. Baxter (2012) Instructions for Use. Available at: <https://www.baxter.fi/sites/g/files/ebysai1556/files/2019-05/CosealIFU.pdf> (Accessed 26 May)
